# Supplementary material for: MiR-217 Regulates SIRT1 Expression and Promotes Inflammatory and Apoptotic Responses in Osteoarthritis
Source: MDPI journal article supplement (doi:10.3390/genes14122155), 2023-11-29
Supplement: s1 [file s1]

**A**

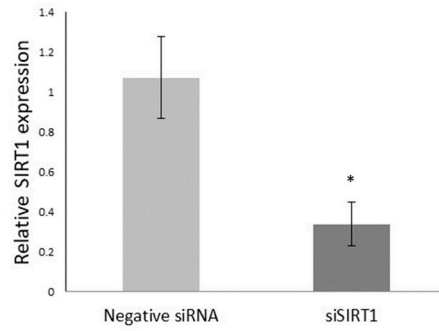

**B**

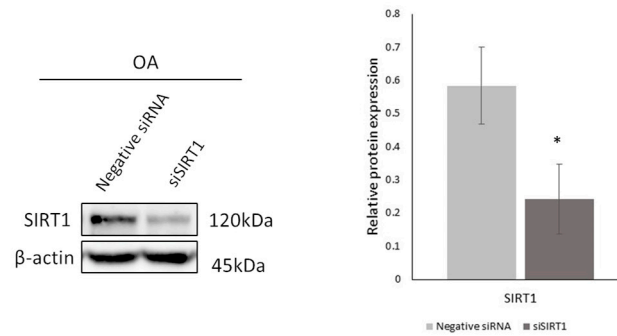

Supplementary Figure S1: siRNA against SIRT1 knockdown efficiency. (A) Differential mRNA expression of SIRT1 in siRNA Negative Control-treated and siSIRT1-treated OA chondrocytes analyzed by qRT-PCR and normalized against GAPDH expression. \* $p < 0.05$  (siSIRT1 vs siRNA Negative Control). (B) Representative immunoblot showing differential protein expression of SIRT1 in siRNA Negative Control-treated and siSIRT1-treated OA chondrocytes. Antibody against  $\beta$ -actin was used as loading control. \* $p < 0.05$  (siSIRT1 vs siRNA Negative Control).
